# Supplementary material for: Allelopathic Activity of Canadian Goldenrod (Solidago canadensis L.) Extracts on Seed Germination and Growth of Lettuce (Lactuca sativa L.) and Garden Pepper Cress (Lepidium sativum L.)
Source: MDPI journal article supplement (doi:10.3390/plants12071421), 2023-03-23
Supplement: s1 [file s1]

# Allelopathic Activity of Canadian Goldenrod (*Solidago canadensis* L.) Extracts on Seed Germination and Growth of Lettuce (*Lactuca sativa* L.) and Garden Pepper Cress (*Lepidium sativum* L.)

Asta Judžentienė, Jurga Būdienė, Linas Labanauskas, Donata Stancelytė and Irena Nedveckytė

**Table S1.** Minor constituents (< 3.0%) identified in inflorescence, leaf and root EOs of *S. canadensis*

| Minor compounds found in the EOs of <i>S. canadensis</i> overground parts (inflorescences and leaves)                                                                                                                                                                                                                                                                                                                                                                                                                                                                                                                                                                                                                                                                                                                                                                                                                                                                                                                                                                                                                                                                                                                                                                                                          |
|----------------------------------------------------------------------------------------------------------------------------------------------------------------------------------------------------------------------------------------------------------------------------------------------------------------------------------------------------------------------------------------------------------------------------------------------------------------------------------------------------------------------------------------------------------------------------------------------------------------------------------------------------------------------------------------------------------------------------------------------------------------------------------------------------------------------------------------------------------------------------------------------------------------------------------------------------------------------------------------------------------------------------------------------------------------------------------------------------------------------------------------------------------------------------------------------------------------------------------------------------------------------------------------------------------------|
| tricyclene, $\alpha$ -thujene, $\alpha$ -myrcene, $\alpha$ -phellandrene, $\alpha$ -, $\gamma$ -terpinene, <i>p</i> -cymene, (Z),(E)- $\beta$ -ocimene, <i>cis</i> -, <i>trans</i> -sabinene hydrate, <i>trans</i> -linalool oxide, terpinolene, linalool*, $\alpha$ -campholenal, 6-camphenone, perillene, sabina ketone, <i>cis</i> -, <i>trans</i> -limonene oxide, pinocarvone, terpinen-4-ol, <i>p</i> -cymen-8-ol, $\alpha$ -terpineol, myrtenol, myrtenal, carvone, myrtenyl acetate, perilla aldehyde, perilla alcohol, $\delta$ -elemene, $\alpha$ -cubebene, eugenol, $\alpha$ -, $\beta$ -ylangene, $\alpha$ -, $\beta$ -copaene, $\beta$ -bourbonene, $\beta$ -caryophyllene*, (E)- $\beta$ -farnesene, $\alpha$ -humulene*, <i>cis</i> -cadin-1(6), 4-diene, <i>cis</i> -muurol-4(14), 5-diene, bicyclogermacrene, $\alpha$ -muurolene, $\beta$ -bisabolene, $\beta$ -sesquiphellandrene, $\alpha$ -, $\gamma$ -, $\delta$ -cadinene, $\alpha$ -, $\beta$ -calacorene, germacrene B, nerolidol, spathulenol, caryophyllene oxide*, salvia-4(14)-en-1-one, <i>cis</i> -cadin-4-en-7-ol, <i>ar</i> -tumerone, $\alpha$ -, $\tau$ -muurolol, $\alpha$ -cadinol, 1,3-dihydrofarnesol, 15-oxy- $\alpha$ -muurolene, phytone, farnesyl acetone, n-hexadecanoic acid, (E,E)-geranyl linalool and phytol. |
| Minor constituents determined in the EO of <i>S. canadensis</i> hairy roots                                                                                                                                                                                                                                                                                                                                                                                                                                                                                                                                                                                                                                                                                                                                                                                                                                                                                                                                                                                                                                                                                                                                                                                                                                    |
| tricyclene, $\alpha$ -thujene, $\alpha$ -myrcene, camphene, sabinene, $\alpha$ -phellandrene, $\alpha$ -, $\gamma$ -terpinene, <i>p</i> -cymene, <i>cis</i> -, <i>trans</i> -sabinene hydrate, terpinolene, <i>p</i> -cymenene, fenchyl alcohol, <i>cis</i> -, <i>trans</i> -limonene oxide, pinocarvone, terpinen-4-ol, myrtenal, <i>p</i> -cymen-8-ol, $\alpha$ -terpineol, myrtenol, myrtenal, thymol methyl ether, carvone, methyl camphonoate, perilla alcohol, carvacrol, (E,E)-2,4-decadienal, $\delta$ -elemene, $\alpha$ -terpinyl acetate, $\alpha$ -, $\beta$ -copaene, (Z)-jasnone, $\alpha$ -bergamotene, $\beta$ -caryophyllene*, (E)- $\beta$ -farnesene, $\alpha$ -humulene*, $\alpha$ -, $\gamma$ -curcumene, $\beta$ -selinene, $\alpha$ -zingiberene, $\alpha$ -selinene, $\beta$ -sesquiphellandrene, humulene epoxide II, intermedeol, phytone and n-hexadecanol.                                                                                                                                                                                                                                                                                                                                                                                                                         |

\* Additional identification with reference compound.

**Table S2.** The effect of root aqueous extracts of *S. canadensis*, *S. virgaurea* and *S. × niedereideri* on germination rate (GR), relative germination (RG) and vigor index (VI) of lettuce (*Lactuca sativa* L.) and garden pepper cress (*Lepidium sativum* L.) seeds.

| AQUEOUS EXTRACTS FROM ROOTS |                         |         |                     |         |                          |         |
|-----------------------------|-------------------------|---------|---------------------|---------|--------------------------|---------|
| Treatments                  | Germination rate, %     |         |                     |         |                          |         |
|                             | <i>S. canadensis</i>    |         | <i>S. virgaurea</i> |         | <i>S. × niedereideri</i> |         |
|                             | Lettuce                 | Cress   | Lettuce             | Cress   | Lettuce                  | Cress   |
| Control                     | 96.7                    | 95.00   | 93.33               | 96.66   | 95.00                    | 93.33   |
| 0.1                         | 90.00                   | 96.66   | 95.00               | 91.66   | 96.66                    | 83.33   |
| 0.5                         | 91.66                   | 76.66   | 50.00*              | 63.33*  | 85.00                    | 76.66   |
| 1.0                         | 88.33                   | 70.00*  | 0.00*               | 8.33*   | 81.66                    | 0.00*   |
| Treatments                  | Relative germination, % |         |                     |         |                          |         |
|                             | <i>S. canadensis</i>    |         | <i>S. virgaurea</i> |         | <i>S. × niedereideri</i> |         |
|                             | Lettuce                 | Cress   | Lettuce             | Cress   | Lettuce                  | Cress   |
| Control                     | 100.00                  | 100.00  | 100.00              | 100.00  | 100.00                   | 100.00  |
| 0.1                         | 93.07                   | 101.75  | 101.79              | 94.83   | 101.75                   | 89.29   |
| 0.5                         | 94.79                   | 80.69   | 53.57*              | 65.52*  | 89.47                    | 82.14   |
| 1.0                         | 91.34                   | 73.68*  | 0.00*               | 8.62*   | 85.96                    | 0.00*   |
| Treatments                  | Vigor index             |         |                     |         |                          |         |
|                             | <i>S. canadensis</i>    |         | <i>S. virgaurea</i> |         | <i>S. × niedereideri</i> |         |
|                             | Lettuce                 | Cress   | Lettuce             | Cress   | Lettuce                  | Cress   |
| Control                     | 3613.36                 | 4303.5  | 4101.85             | 4734.73 | 4107.17                  | 4703.83 |
| 0.1                         | 2973.00                 | 3576.42 | 3747.75             | 6234.41 | 3201.06                  | 3501.25 |
| 0.5                         | 4700.63                 | 2922.02 | 390.83              | 2829.79 | 2657.67                  | 3746.12 |
| 1.0                         | 4943.53                 | 3371.67 | 0.00                | 11.11   | 2497.43                  | 0.00    |

Asterisk (\*) indicates a statistically significant difference compared to the control (G-test,  $p < 0.05$ ).

**Table S3.** The effect of leaf aqueous extracts of *S. canadensis*, *S. virgaurea* and *S. × niedereideri* on germination rate (GR), relative germination (RG) and vigor index (VI) of lettuce and garden pepper cress seeds.

| AQUEOUS EXTRACTS FROM LEAVES |                         |         |                     |         |                          |         |
|------------------------------|-------------------------|---------|---------------------|---------|--------------------------|---------|
| Treatments                   | Germination rate, %     |         |                     |         |                          |         |
|                              | <i>S. canadensis</i>    |         | <i>S. virgaurea</i> |         | <i>S. × niedereideri</i> |         |
|                              | Lettuce                 | Cress   | Lettuce             | Cress   | Lettuce                  | Cress   |
| <b>Control</b>               | 95.00                   | 91.67   | 95.00               | 93.33   | 93.33                    | 93.33   |
| <b>0.1</b>                   | 86.67                   | 86.67   | 88.33               | 98.33   | 93.33                    | 86.67   |
| <b>0.5</b>                   | 78.33                   | 85.00   | 91.67               | 91.67   | 88.33                    | 63.33*  |
| <b>1.0</b>                   | 80.00                   | 70.00   | 86.67               | 96.67   | 85.00                    | 68.33*  |
| Treatments                   | Relative germination, % |         |                     |         |                          |         |
|                              | <i>S. canadensis</i>    |         | <i>S. virgaurea</i> |         | <i>S. × niedereideri</i> |         |
|                              | Lettuce                 | Cress   | Lettuce             | Cress   | Lettuce                  | Cress   |
| <b>Control</b>               | 100.00                  | 100.00  | 100.00              | 100.00  | 100.00                   | 100.00  |
| <b>0.1</b>                   | 91.23                   | 94.55   | 92.98               | 105.36  | 100.00                   | 92.86   |
| <b>0.5</b>                   | 82.45                   | 92.72   | 96.49               | 98.22   | 94.64                    | 67.86*  |
| <b>1.0</b>                   | 84.21                   | 76.36   | 91.23               | 103.58  | 91.07                    | 73.21*  |
| Treatments                   | Vigor index             |         |                     |         |                          |         |
|                              | <i>S. canadensis</i>    |         | <i>S. virgaurea</i> |         | <i>S. × niedereideri</i> |         |
|                              | Lettuce                 | Cress   | Lettuce             | Cress   | Lettuce                  | Cress   |
| <b>Control</b>               | 3560.92                 | 6566.63 | 4056.5              | 5590.47 | 4342.96                  | 5646.46 |
| <b>0.1</b>                   | 2049.75                 | 4659.96 | 3587.67             | 4131.5  | 3008.34                  | 4729.29 |
| <b>0.5</b>                   | 852.49                  | 1358.58 | 3012.89             | 1643.95 | 2203.83                  | 815.9   |
| <b>1.0</b>                   | 548.00                  | 165.67  | 1451.72             | 159.5   | 1137.58                  | 86.55   |

Asterisk (\*) indicates a statistically significant difference compared to the control (G-test,  $p < 0.05$ ).

**Table S4.** The effect of inflorescence aqueous extracts of *S. canadensis*, *S. virgaurea* and *S. × niedereideri* on germination rate (GR), relative germination (RG) and vigor index (VI) of lettuce and garden pepper cress seeds.

| AQUEOUS EXTRACTS FROM INFLORESCENCES |                         |         |                     |         |                          |         |
|--------------------------------------|-------------------------|---------|---------------------|---------|--------------------------|---------|
| Treatments                           | Germination rate, %     |         |                     |         |                          |         |
|                                      | <i>S. canadensis</i>    |         | <i>S. virgaurea</i> |         | <i>S. × niedereideri</i> |         |
|                                      | Lettuce                 | Cress   | Lettuce             | Cress   | Lettuce                  | Cress   |
| <b>Control</b>                       | 86.67                   | 95.00   | 95.00               | 93.33   | 93.33                    | 95.00   |
| <b>0.1</b>                           | 83.33                   | 88.33   | 86.67               | 81.67   | 95.00                    | 88.33   |
| <b>0.5</b>                           | 85.00                   | 58.33*  | 86.67               | 71.67   | 86.67                    | 0.00*   |
| <b>1.0</b>                           | 60.00*                  | 51.67*  | 71.67               | 50.00*  | 83.33                    | 0.00*   |
| Treatments                           | Relative germination, % |         |                     |         |                          |         |
|                                      | <i>S. canadensis</i>    |         | <i>S. virgaurea</i> |         | <i>S. × niedereideri</i> |         |
|                                      | Lettuce                 | Cress   | Lettuce             | Cress   | Lettuce                  | Cress   |
| <b>Control</b>                       | 100.00                  | 100.00  | 100.00              | 100.00  | 100.00                   | 100.00  |
| <b>0.1</b>                           | 96.15                   | 92.98   | 91.23               | 87.51   | 101.79                   | 92.98   |
| <b>0.5</b>                           | 98.07                   | 61.40*  | 91.23               | 76.79   | 92.86                    | 0.00*   |
| <b>1.0</b>                           | 69.23*                  | 54.39*  | 75.44               | 53.57*  | 89.28                    | 0.00*   |
| Treatments                           | Vigor index             |         |                     |         |                          |         |
|                                      | <i>S. canadensis</i>    |         | <i>S. virgaurea</i> |         | <i>S. × niedereideri</i> |         |
|                                      | Lettuce                 | Cress   | Lettuce             | Cress   | Lettuce                  | Cress   |
| <b>Control</b>                       | 3475.47                 | 6574.00 | 3477.00             | 5654.24 | 3386.32                  | 6194.5  |
| <b>0.1</b>                           | 1831.87                 | 2271.55 | 2444.09             | 3456.00 | 3272.75                  | 5198.22 |
| <b>0.5</b>                           | 640.33                  | 42.77   | 2088.75             | 93.17   | 1310.16                  | 0.00    |
| <b>1.0</b>                           | 126.00                  | 27.56   | 265.18              | 30.00   | 552.76                   | 0.00    |

Asterisk (\*) indicates a statistically significant difference compared to the control (G-test,  $p < 0.05$ ).

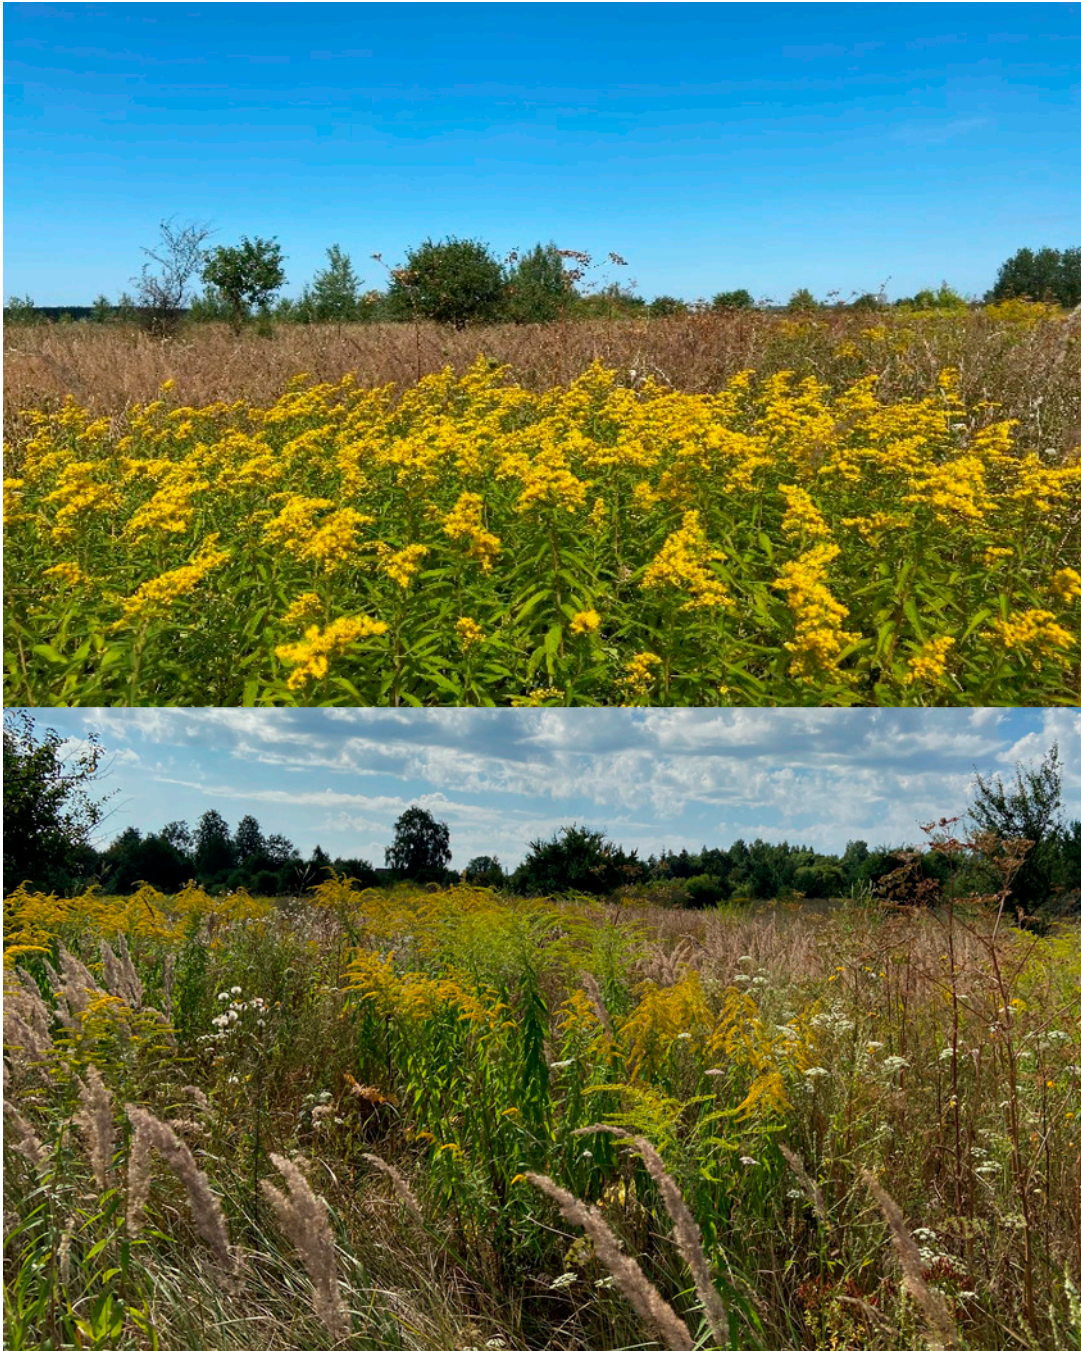

**Figure S1.** Sampling site of plant material of *Solidago* species (*S. canadensis*, *S. virgaurea* and *S. × niedereideri*) in Eastern Lithuania (Vilnius, Trakai municipality, Letvaris).

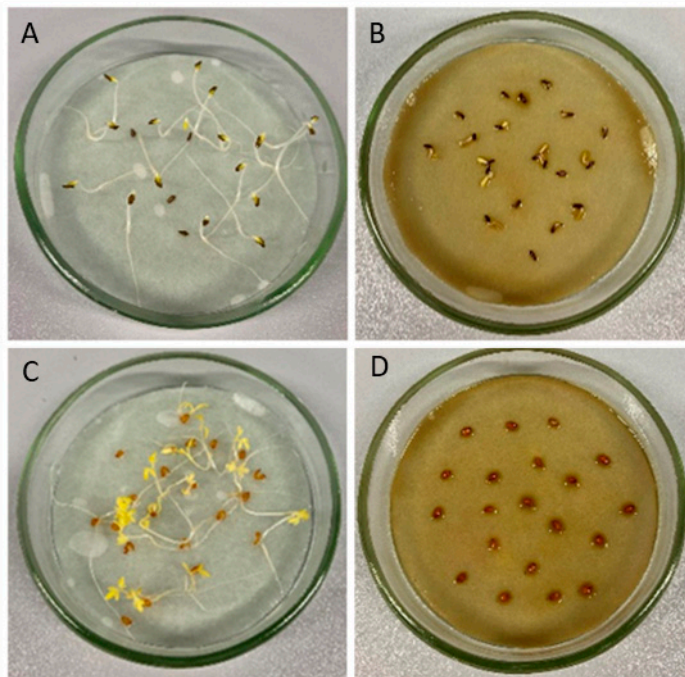

**Figure S2.** Control samples of *Lactuca sativa* L. seeds (A) and *L. sativa* seeds after treatment of aqueous *S. canadensis* root extract (B). Control samples of *Lepidium sativum* L. seeds (C) and *L. sativum* seeds after treatment of aqueous *S. canadensis* root extract (D).
